# Supplementary material
Source: publisher figshare collection journal article supplement (https://acs.figshare.com/ndownloader/files/4262383)

## **Supplemental Information**

### **Relationship between conformational stability and amplification efficiency of prions**

**Nuria Gonzalez-Montalban<sup>1</sup>, Natallia Makarava<sup>1</sup>, Regina Savtchenko<sup>1</sup>, Ilia V. Baskakov<sup>1,2</sup>**

The Center for Biomedical Engineering and Technology<sup>1</sup> and <sup>d</sup>Department of Anatomy and Neurobiology<sup>2</sup>, University of Maryland School of Medicine, Baltimore, MD, 21201, USA

**Figure S1. Analysis of RNA content in RNA-depleted NBH.** 10% NBH was treated with RNase (100ug/ml) for 1 hour and RNA content was analyzed using 1.2% Agarose gel and staining with ethidium bromide. Mock-digested 10% NBH is shown as a reference. DNA markers were used as running standards.

Figure S1

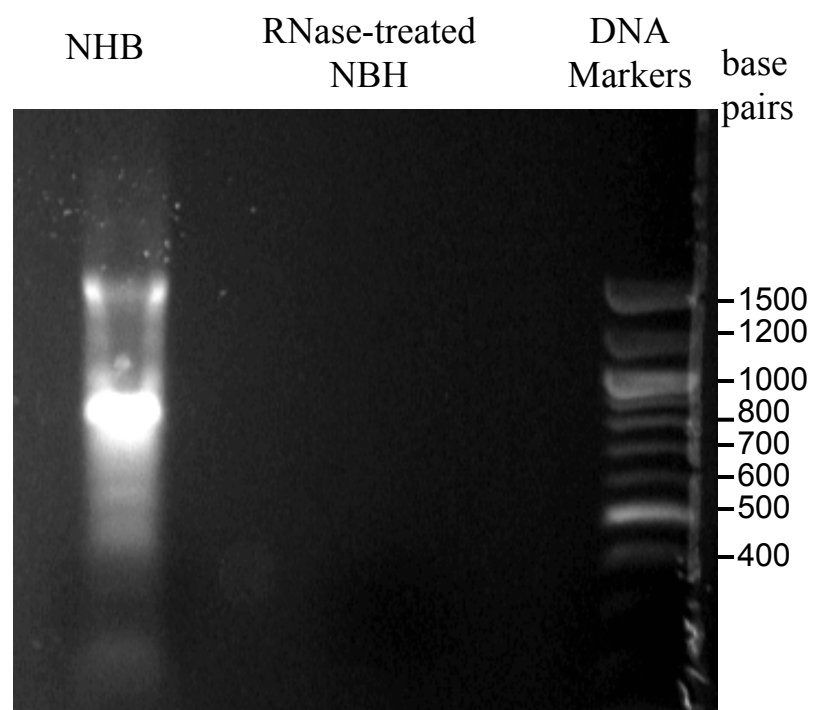

Supplement: Supplementary file 1 [file 4262383]
